# Supplementary material for: Dietary Propolis Ameliorates Dextran Sulfate Sodium-Induced Colitis and Modulates the Gut Microbiota in Rats Fed a Western Diet
Source: MDPI journal article supplement (doi:10.3390/nu9080875), 2017-08-14
Supplement: s1 [file s1]

**Figure S1.** LEfSe comparison of the relative abundances of gut microbiota in the 0% propolis, 0.3% propolis and untreated control groups. The taxonomic cladogram was derived from LEfSe analysis of 16S sequences. Class CP means 0.3% propolis, Class DSS means 0% propolis and Class N means untreated control group. Only taxa meeting an LDA score threshold > 4.0 are listed and their relative abundances are shown. Relative abundance of a bacterial type is shown as the percentage of total OTU counts. The straight line shows the group average abundance and the dashed line shows the group median abundance.

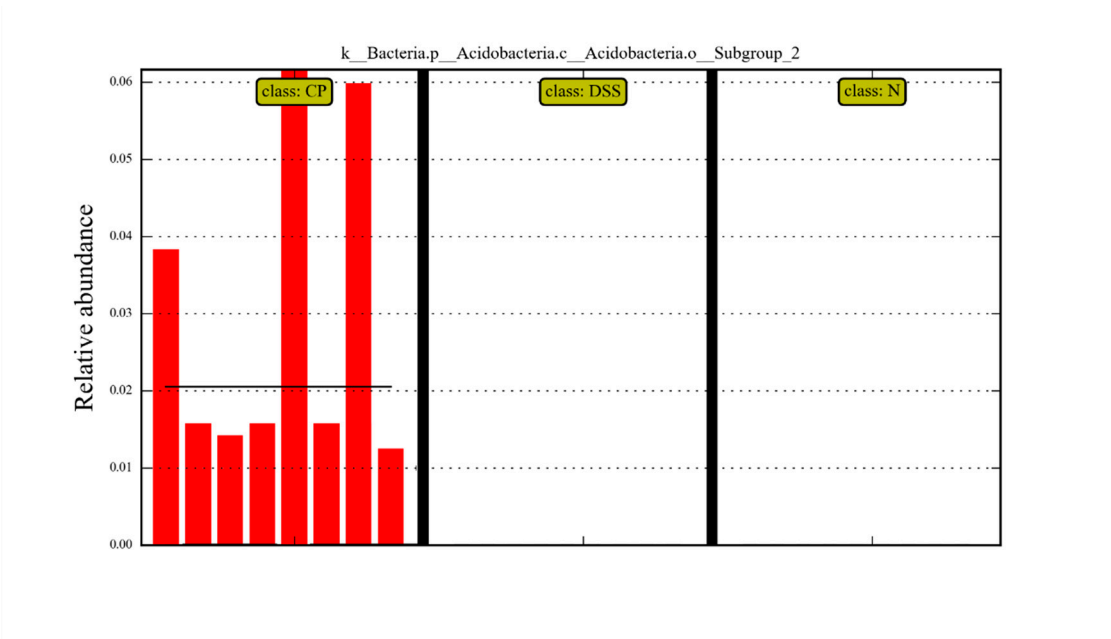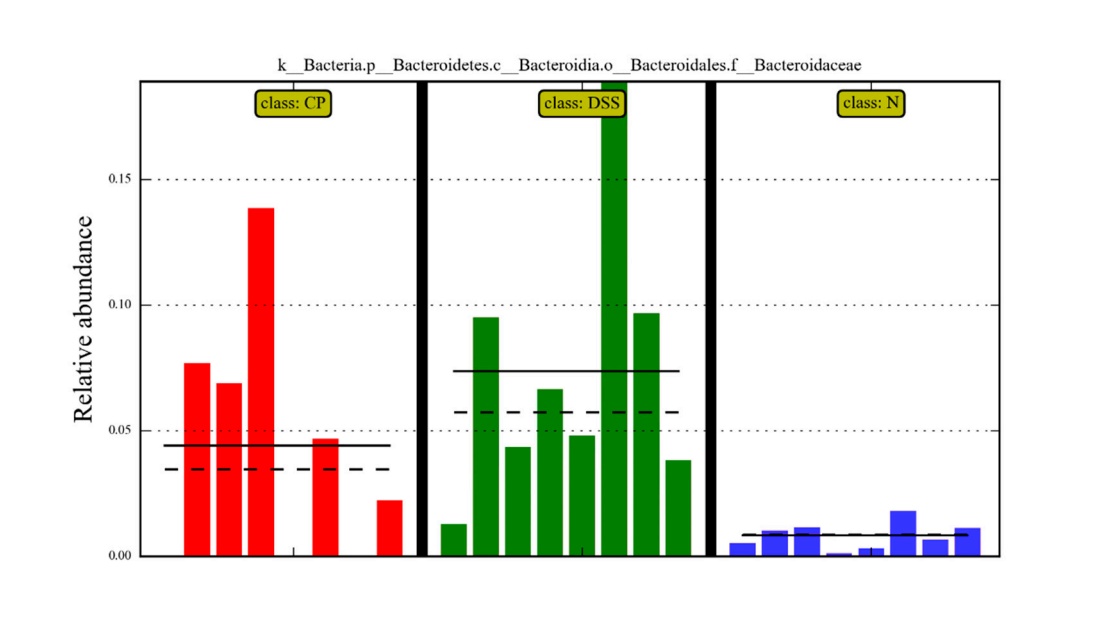

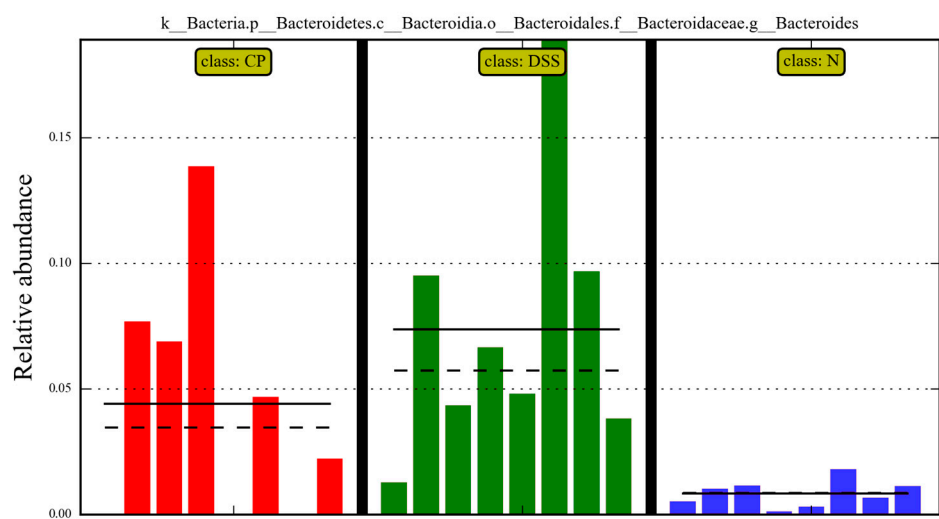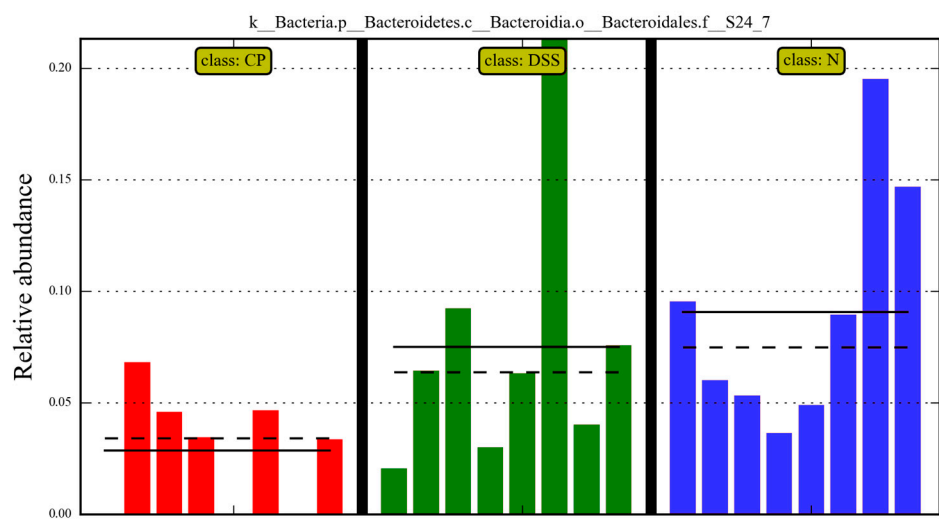

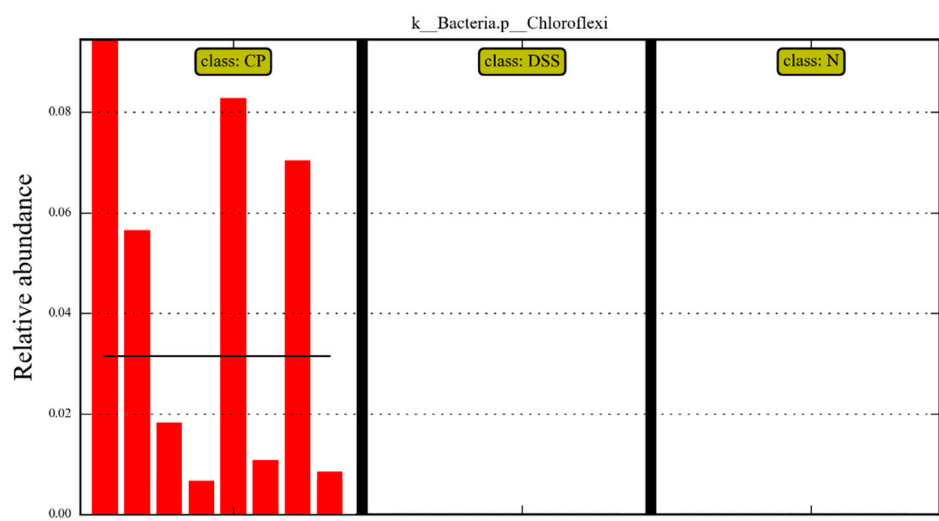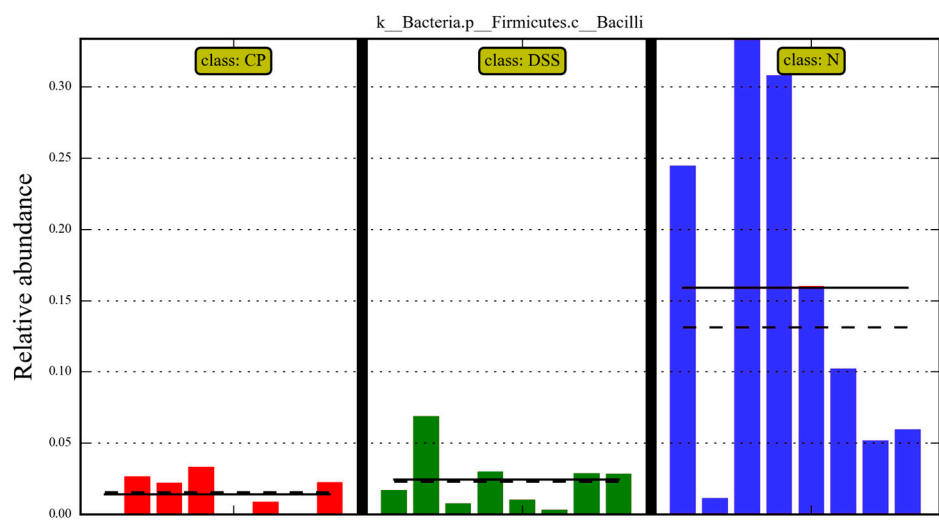

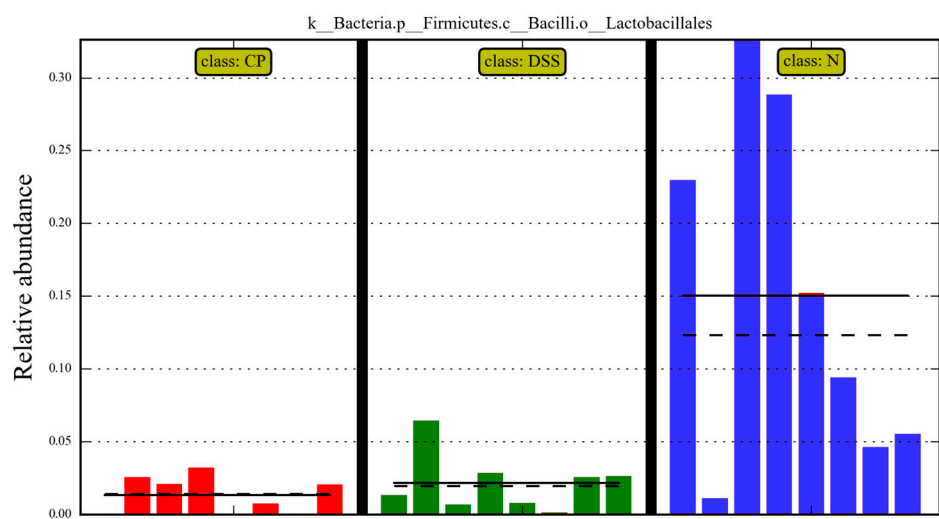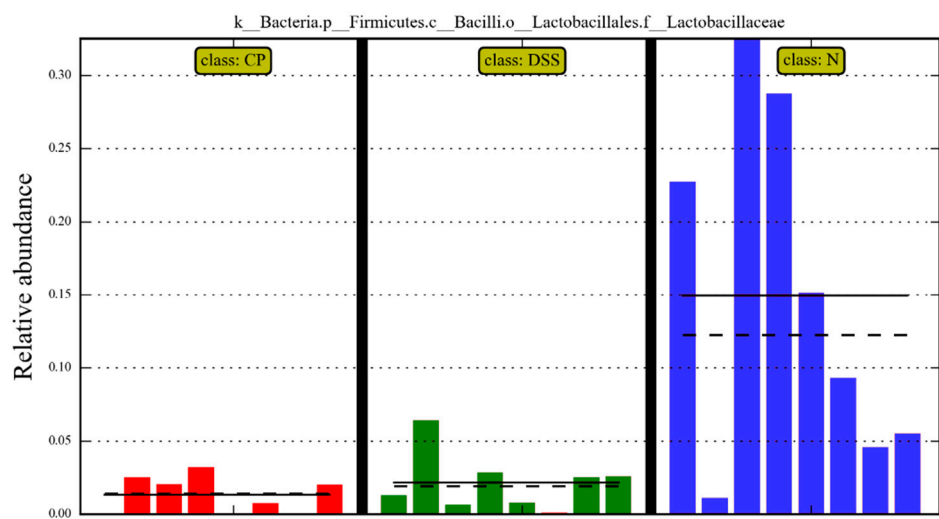



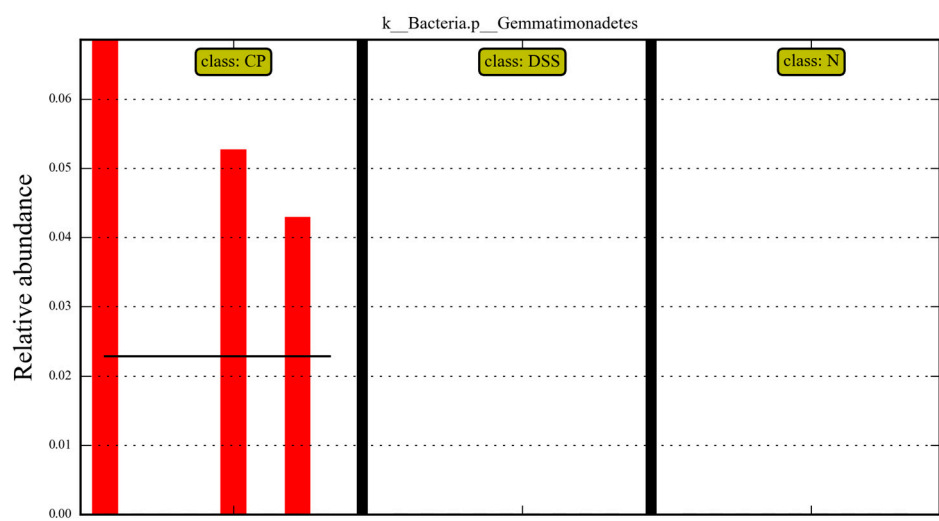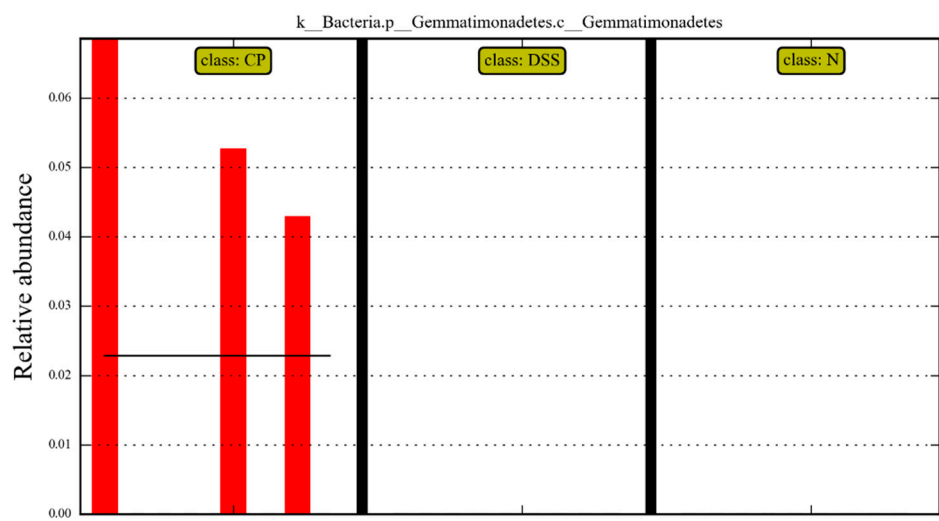

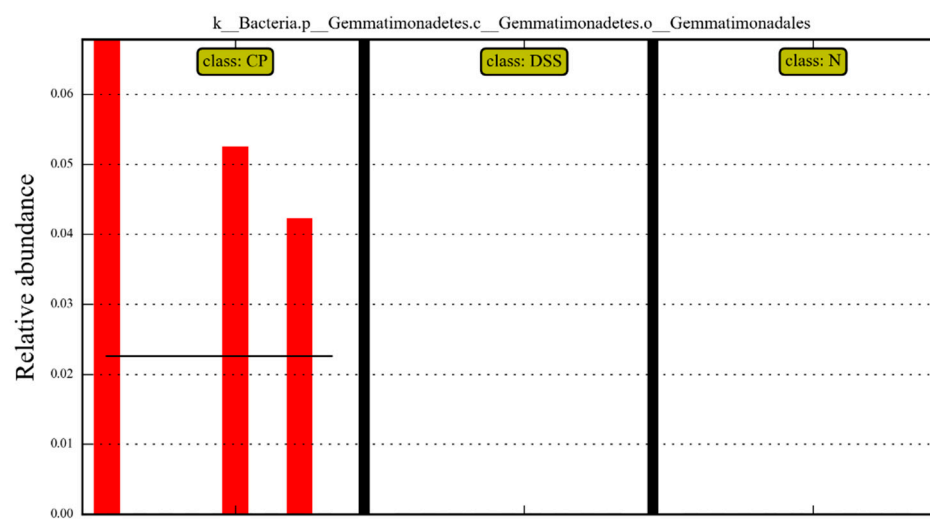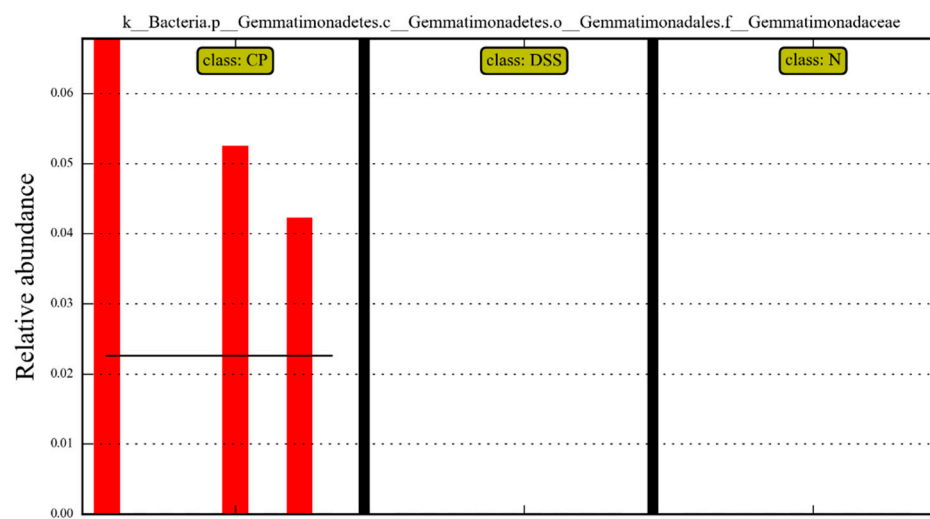

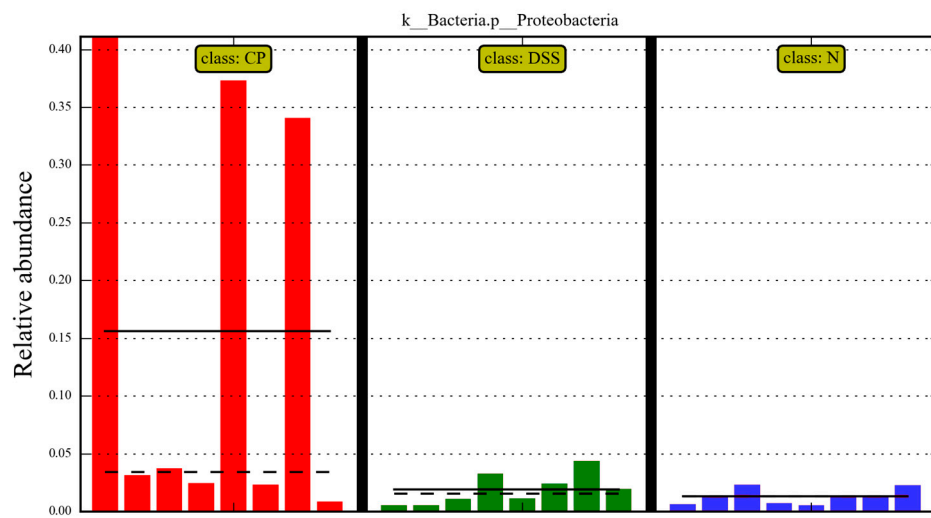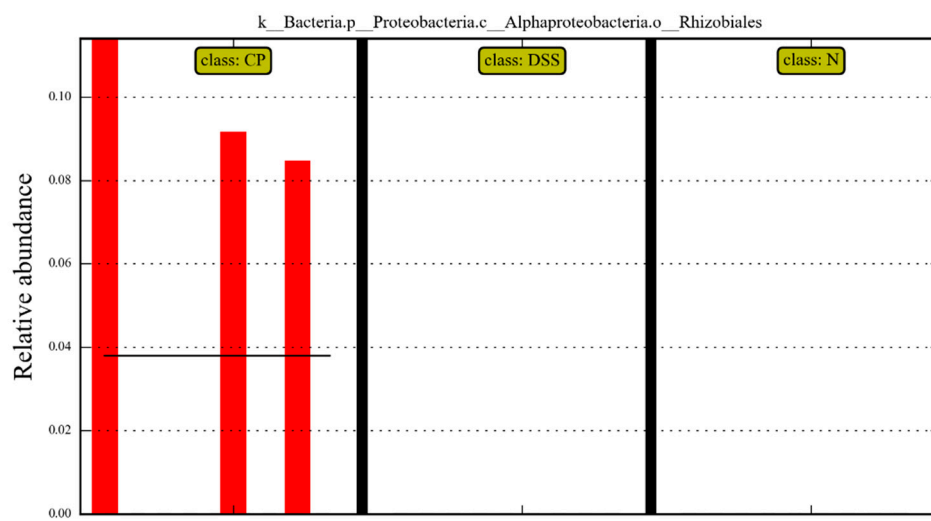





**Supplementary Table S1.** Weight gain, colon length/weight, organ and fat pad weights of untreated control rats <sup>1</sup>.

| <b>Indices</b>                | <b>Untreated Control</b> |
|-------------------------------|--------------------------|
| Weight gain (g)               | 72.6 ± 6.7               |
| Colon length/weight<br>(mm/g) | 52.42 ± 1.5              |
| Total fat pad (mg/g)          | 27.2 ± 0.6               |
| Liver (mg/g)                  | 35.5 ± 0.3               |
| Spleen(mg/g)                  | 2.3 ± 0.0                |
| Kidney (mg/g)                 | 7.1 ± 0.2                |

<sup>1</sup> Data are expressed as means ± SEM (*n* = 5). Fat pad weights were measured as the sum of the epididymal, retroperitoneal and mesenteric fat pads.

**Supplementary Table S2.** Individual and total SCFA levels in normal rats<sup>1</sup>.

| <b>Variables</b>          | <b>Treatment</b>  |
|---------------------------|-------------------|
| Cecum<br>weights, g       | Untreated Control |
| Tissue                    | 0.7 ± 0.1         |
| Digesta                   | 1.8 ± 0.1         |
| Cecum pH                  | 7.8 ± 0.1         |
| Pool, μmol                | Untreated Control |
| Acetate                   | 60.8 ± 9.4        |
| Propionate                | 17.4 ± 1.6        |
| Butyrate                  | 13.4 ± 2.6        |
| Total SCFA                | 96.7 ± 11.9       |
| Percentage of<br>total, % | Untreated Control |
| Acetate                   | 62.3 ± 1.5        |
| Propionate                | 18.1 ± 0.6        |
| Butyrate                  | 13.9 ± 1.1        |

<sup>1</sup> Data are expressed as means ± SEM (*n* = 5).
